# Supplementary material for: Not Just How Much, But How Many: Overall and Domain-Specific Activity Variety and Cognitive Functioning in Adulthood
Source: Oxford University Press journal article supplement (doi:10.1093/geronb/gbac053), 2022-03-15
Supplement: gbac053_suppl_supplementary_material.pdf [file gbac053_suppl_supplementary_material.pdf]

**Supplementary Table 1**

*Lower Diagonal Correlation Matrix of the Relationship Between Activity Variety and Frequency Variables at Wave 2*

|           |           | Variety at Wave 2 |           |          |        | Frequency at Wave 2 |           |          |        |
|-----------|-----------|-------------------|-----------|----------|--------|---------------------|-----------|----------|--------|
|           |           | Overall           | Cognitive | Physical | Social | Overall             | Cognitive | Physical | Social |
|           | Overall   | 1.00              |           |          |        |                     |           |          |        |
| Variety   | Cognitive | .74***            | 1.00      |          |        |                     |           |          |        |
| at Wave 2 | Physical  | .67***            | .22***    | 1.00     |        |                     |           |          |        |
|           | Social    | .73***            | .35***    | .20***   | 1.00   |                     |           |          |        |
|           | Overall   | .65***            | .57***    | .50***   | .31*** | 1.00                |           |          |        |
| Frequency | Cognitive | .61***            | .82***    | .19***   | .29*** | .68***              | 1.00      |          |        |
| at Wave 2 | Physical  | .56***            | .24***    | .74***   | .22*** | .67***              | .24***    | 1.00     |        |
|           | Social    | .07***            | .04*      | .03      | .08*** | .57***              | .05**     | .04**    | 1.00   |

*Notes:*  $N = 3337$ . The scores of each overall, cognitive, physical, and social activity variety and frequency were standardized.

\*  $p < .05$ , \*\*  $p < .01$ , \*\*\*  $p < .0001$ .

**Supplementary Table 2**

*Correlation Matrix Between Activity Variety and Activity Frequency at Wave 2 with the same Activity Variety and Activity Frequency at Wave 3*

|                        |           | Variety at Wave 3 |           |          |        | Frequency at Wave 3 |           |          |        |
|------------------------|-----------|-------------------|-----------|----------|--------|---------------------|-----------|----------|--------|
|                        |           | Overall           | Cognitive | Physical | Social | Overall             | Cognitive | Physical | Social |
| Variety<br>at Wave 2   | Overall   | .61***            | .52***    | .32***   | .47*** | .42***              | .46***    | .33***   | -.01   |
|                        | Cognitive | .49***            | .58***    | .15***   | .32*** | .38***              | .53***    | .17***   | .02    |
|                        | Physical  | .33***            | .20***    | .35***   | .16*** | .27***              | .17***    | .34***   | -.01   |
|                        | Social    | .45***            | .30***    | .16***   | .50*** | .22***              | .25***    | .20***   | -.04   |
| Frequency<br>at Wave 2 | Overall   | .43***            | .42***    | .25***   | .26*** | .50***              | .47***    | .34***   | .13*** |
|                        | Cognitive | .41***            | .52***    | .10***   | .25*** | .41***              | .61***    | .14***   | .03    |
|                        | Physical  | .35***            | .23***    | .34***   | .19*** | .38***              | .24***    | .48***   | -.01   |
|                        | Social    | .06**             | .04***    | .04***   | .05*   | .16***              | .04       | .02      | .24*** |

*Notes:*  $N = 2049$ . The scores of each overall, cognitive, physical, and social activity variety and frequency were standardized.

\*  $p < .05$ , \*\*  $p < .01$ , \*\*\*  $p < .0001$ .

### Supplementary Table 3

#### *Cross-Sectional Associations of Activity Variety at Wave 2 With Executive Functioning and Episodic Memory at Wave 2*

|                                         | Model 1               |              |                 |              | Model 2               |              |                 |              |
|-----------------------------------------|-----------------------|--------------|-----------------|--------------|-----------------------|--------------|-----------------|--------------|
|                                         | Executive functioning |              | Episodic memory |              | Executive functioning |              | Episodic memory |              |
|                                         | <i>B(SE)</i>          | 95% CI       | <i>B(SE)</i>    | 95% CI       | <i>B(SE)</i>          | 95% CI       | <i>B(SE)</i>    | 95% CI       |
| Intercept                               | .09(.03)**            | [.03, .15]   | -.11(.05)*      | [-.21, -.02] | .11(.03)**            | [.05, .17]   | -.11(.05)*      | [-.20, -.01] |
| Age                                     | -.02(.00)***          | [-.02, -.01] | -.02(.00)***    | [-.02, -.02] | -.02(.00)***          | [-.02, -.02] | -.02(.00)***    | [-.02, -.02] |
| Men (vs. Women)                         | -.08(.02)***          | [-.12, -.05] | .45(.03)***     | [.38, .51]   | -.10(.02)***          | [-.14, -.06] | .43(.03)***     | [.37, .50]   |
| White (vs. Non-white)                   | -.25(.04)***          | [-.32, -.18] | -.24(.06)***    | [-.35, -.13] | -.24(.03)***          | [-.31, -.17] | -.24(.06)***    | [-.35, -.13] |
| Education                               | .07(.00)***           | [.06, .07]   | .04(.01)***     | [.02, .05]   | .06(.00)***           | [.05, .07]   | .03(.01)***     | [.02, .05]   |
| Currently working (vs. not working)     | -.05(.02)*            | [-.09, -.01] | .01(.03)        | [-.05, .07]  | -.05(.02)*            | [-.09, -.00] | .02(.03)        | [-.05, .08]  |
| Married (vs. not married/partnered)     | -.03(.02)             | [-.07, .02]  | .02(.03)        | [-.04, .09]  | -.04(.02)             | [-.08, .00]  | .02(.03)        | [-.04, .08]  |
| Number of chronic conditions            | -.01(.00)*            | [-.02, -.00] | -.02(.01)*      | [-.03, -.00] | -.01(.00)*            | [-.02, -.00] | -.02(.01)*      | [-.03, -.00] |
| Instrumental activities of daily living | -.04(.01)**           | [-.06, -.01] | -.03(.02)       | [-.07, .01]  | -.04(.01)**           | [-.06, -.01] | -.03(.02)       | [-.07, .01]  |
| History of depression/anxiety (vs. no)  | .04(.03)              | [-.01, .10]  | -.11(.04)*      | [-.20, -.03] | .03(.03)              | [-.02, .09]  | -.12(.04)**     | [-.20, -.03] |
| Personality-extraversion                | -.06(.02)**           | [-.10, -.02] | .01(.03)        | [-.06, .07]  | -.05(.02)**           | [-.09, -.01] | .01(.03)        | [-.05, .08]  |
| Personality-openness                    | .02(.02)              | [-.02, .06]  | .04(.03)        | [-.02, .11]  | -.00(.02)             | [-.05, .04]  | .03(.03)        | [-.04, .10]  |
| Personality-neuroticism                 | -.01(.02)             | [-.04, .02]  | -.06(.03)*      | [-.11, -.00] | -.01(.02)             | [-.04, .02]  | -.06(.03)*      | [-.11, -.01] |

|                                              |                               |                   |                               |                   |                         |              |                        |             |
|----------------------------------------------|-------------------------------|-------------------|-------------------------------|-------------------|-------------------------|--------------|------------------------|-------------|
| Personality-agreeableness                    | -.00(.02)                     | [-.05, .04]       | .00(.04)                      | [-.07, .07]       | .00(.02)                | [-.03, .05]  | .00(.04)               | [-.07, .07] |
| Personality-conscientiousness                | .03(.02)                      | [-.01, .08]       | .05(.03)                      | [-.01, .12]       | .03(.02)                | [-.01, .07]  | .06(.03)               | [-.01, .13] |
| Activity frequency across domains at W2      | .09(.02) <sup>***</sup>       | [.05, .13]        | .10(.03) <sup>**</sup>        | [.04, .16]        | -                       | -            | -                      | -           |
| <b>Activity variety across domains at W2</b> | <b>.13(.02)<sup>***</sup></b> | <b>[.10, .17]</b> | <b>.17(.03)<sup>***</sup></b> | <b>[.11, .22]</b> | -                       | -            | -                      | -           |
| Cognitive activity frequency at W2           | -                             | -                 | -                             | -                 | .14(.02) <sup>***</sup> | [.01, .17]   | .05(.03)               | [-.00, .10] |
| Physical activity frequency at W2            | -                             | -                 | -                             | -                 | .04(.01) <sup>*</sup>   | [.01, .06]   | .02(.02)               | [-.03, .06] |
| Social activity frequency at W2              | -                             | -                 | -                             | -                 | -.02(.01) <sup>*</sup>  | [-.04, -.00] | .02(.01)               | [-.01, .05] |
| <b>Cognitive activity variety at W2</b>      | -                             | -                 | -                             | -                 | -.00(.02)               | [-.04, .03]  | .09(.03) <sup>**</sup> | [.04, .14]  |
| <b>Physical activity variety at W2</b>       | -                             | -                 | -                             | -                 | .02(.01)                | [-.00, .05]  | .06(.02) <sup>**</sup> | [.02, .10]  |
| <b>Social activity variety at W2</b>         | -                             | -                 | -                             | -                 | .03(.01) <sup>**</sup>  | [.01, .05]   | .02(.02)               | [-.01, .05] |

*Notes:*  $N = 3337$ . Scores of activity frequency, activity variety, and cognitive variables (executive functioning, episodic memory) were standardized. The main variables of interest are highlighted. CI = confidence interval.

\*  $p < .05$ , \*\*  $p < .01$ , \*\*\*  $p < .0001$ .

### Supplementary Table 4

*Interaction Effect of Age in the Associations of Overall Activity Variety at W2 and Activity Frequency With Cognitive Functioning at W3*

|                                                                                          | Overall cognitive functioning |              | Executive functioning |              | Episodic memory |              |
|------------------------------------------------------------------------------------------|-------------------------------|--------------|-----------------------|--------------|-----------------|--------------|
|                                                                                          | <i>B (SE)</i>                 | 95% CI       | <i>B (SE)</i>         | 95% CI       | <i>B (SE)</i>   | 95% CI       |
| Interaction effect of age in the association of activity variety with cognitive outcomes |                               |              |                       |              |                 |              |
| Intercept                                                                                | -.01(.03)                     | [-.06, .05]  | .10(.03)**            | [.04, .16]   | -.27(.06)***    | [-.38, -.16] |
| Age                                                                                      | -.01(.00)***                  | [-.01, -.01] | -.01(.00)***          | [-.01, -.01] | -.02(.00)***    | [-.02, -.01] |
| Men (vs. Women)                                                                          | .05(.02)*                     | [.01, .08]   | -.13(.02)***          | [-.17, -.09] | .49(.04)***     | [.41, .56]   |
| White (vs. Non-white)                                                                    | -.08(.04)*                    | [-.15, -.01] | -.10(.04)*            | [-.18, -.02] | -.03(.07)       | [-.17, .11]  |
| Education                                                                                | .01(.00)**                    | [.00, .02]   | .02(.00)***           | [.01, .03]   | -.01(.01)       | [-.02, .01]  |
| Currently working (vs. not working)                                                      | -.07(.02)**                   | [-.11, -.03] | -.08(.02)***          | [-.13, -.04] | -.04(.04)       | [-.11, .04]  |
| Married (vs. not married/partnered)                                                      | -.02(.02)                     | [-.06, .02]  | -.04(.02)             | [-.08, .01]  | .02(.04)        | [-.06, .10]  |
| Number of chronic conditions                                                             | -.00(.00)                     | [-.01, .01]  | -.01(.01)             | [-.02, .00]  | .01(.01)        | [-.01, .03]  |
| Instrumental activities of daily living                                                  | -.01(.01)                     | [-.04, .01]  | .00(.01)              | [-.02, .03]  | -.05(.03)*      | [-.17, -.00] |
| History of depression/anxiety (vs. no)                                                   | .03(.03)                      | [-.03, .08]  | .03(.03)              | [-.03, .09]  | .03(.05)        | [-.08, .13]  |
| Personality-extraversion                                                                 | -.02(.02)                     | [-.06, .02]  | -.03(.02)             | [-.08, .01]  | .01(.04)        | [-.07, .08]  |
| Personality-openness                                                                     | .01(.02)                      | [-.03, .05]  | .02(.02)              | [-.03, .06]  | -.01(.04)       | [-.09, .07]  |
| Personality-neuroticism                                                                  | -.01(.02)                     | [-.04, .02]  | .00(.02)              | [-.03, .04]  | -.04(.03)       | [-.11, .02]  |

|                                   |             |             |             |              |             |             |
|-----------------------------------|-------------|-------------|-------------|--------------|-------------|-------------|
| Personality-agreeableness         | -.03(.02)   | [-.07, .01] | -.04(.02)   | [-.09, .00]  | -.00(.04)   | [-.08, .08] |
| Personality-conscientiousness     | -.02(.02)   | [-.02, .06] | .01(.02)    | [-.03, .06]  | .03(.04)    | [-.05, .12] |
| Cognitive functioning at W2       | .60(.02)*** | [.57, .63]  | .62(.02)*** | [.58, .66]   | .55(.03)*** | [.48, .62]  |
| Change in activity variety        | .08(.02)*** | [.05, .12]  | .06(.02)**  | [.02, .10]   | .14(.04)**  | [.07, .21]  |
| Change in activity frequency      | .03(.02)    | [-.01, .07] | .04(.02)    | [-.00, .09]  | .01(.04)    | [-.07, .09] |
| Activity frequency at W2          | .02(.02)    | [-.02, .06] | .04(.02)    | [-.01, .09]  | -.02(.04)   | [-.11, .06] |
| Activity variety at W2            | .10(.02)*** | [.06, .14]  | .07(.02)**  | [.02, .11]   | .18(.04)*** | [.10, .26]  |
| <b>Age*activity variety at W2</b> | -.00(.00)   | [-.00, .00] | -.00(.00)*  | [-.01, -.00] | .00(.00)    | [-.00, .01] |

---

Interaction effect of age in the association of activity frequency with cognitive outcomes

|                                         |              |              |              |              |              |              |
|-----------------------------------------|--------------|--------------|--------------|--------------|--------------|--------------|
| Intercept                               | -.01(.03)    | [-.06, .05]  | .10(.03)**   | [.04, .16]   | -.27(.06)*** | [-.39, -.16] |
| Age                                     | -.01(.00)*** | [-.01, -.01] | -.01(.00)*** | [-.01, -.01] | -.02(.00)*** | [-.02, -.01] |
| Men (vs. Women)                         | .05(.02)*    | [.01, .09]   | -.13(.02)*** | [-.17, -.09] | .48(.04)***  | [.41, .56]   |
| White (vs. Non-white)                   | -.08(.04)*   | [-.15, -.01] | -.10(.04)*   | [-.18, -.02] | -.02(.07)    | [-.17, .11]  |
| Education                               | .01(.00)*    | [.00, .02]   | .02(.00)***  | [.01, .03]   | -.01(.01)    | [-.02, .01]  |
| Currently working (vs. not working)     | -.07(.02)**  | [-.11, -.03] | -.09(.02)*** | [-.13, -.04] | -.04(.04)    | [-.11, .04]  |
| Married (vs. not married/partnered)     | -.02(.02)    | [-.06, .02]  | -.04(.02)    | [-.08, .00]  | .02(.04)     | [-.06, .10]  |
| Number of chronic conditions            | -.00(.00)    | [-.01, .01]  | -.01(.01)    | [-.02, .00]  | .01(.01)     | [-.01, .03]  |
| Instrumental activities of daily living | -.01(.01)    | [-.04, .01]  | .00(.01)     | [-.02, .03]  | -.05(.03)*   | [-.11, -.00] |
| History of depression/anxiety (vs. no)  | .03(.03)     | [-.03, .08]  | .03(.03)     | [-.03, .09]  | .03(.05)     | [-.08, .13]  |

|                                     |             |             |             |             |             |             |
|-------------------------------------|-------------|-------------|-------------|-------------|-------------|-------------|
| Personality-extraversion            | -.02(.02)   | [-.06, .02] | -.03(.02)   | [-.08, .01] | .01(.04)    | [-.07, .08] |
| Personality-openness                | .01(.02)    | [-.03, .05] | .02(.02)    | [-.02, .06] | -.01(.04)   | [-.09, .07] |
| Personality-neuroticism             | -.01(.02)   | [-.04, .02] | .00(.02)    | [-.03, .04] | -.04(.03)   | [-.10, .02] |
| Personality-agreeableness           | -.03(.02)   | [-.07, .01] | -.04(.02)   | [-.09, .00] | -.00(.04)   | [-.08, .08] |
| Personality-conscientiousness       | .02(.02)    | [-.02, .06] | .01(.02)    | [-.03, .06] | .03(.04)    | [-.05, .12] |
| Cognitive functioning at W2         | .60(.02)*** | [.57, .63]  | .62(.02)*** | [.59, .66]  | .55(.03)*** | [.48, .61]  |
| Change in activity variety          | .08(.02)*** | [.05, .12]  | .06(.02)**  | [.02, .10]  | .14(.04)**  | [.07, .22]  |
| Change in activity frequency        | .03(.02)    | [-.01, .07] | .04(.02)    | [-.00, .09] | .01(.04)    | [-.07, .08] |
| Activity frequency at W2            | .02(.02)    | [-.03, .06] | .03(.02)    | [-.02, .08] | -.02(.04)   | [-.11, .07] |
| Activity variety at W2              | .10(.02)*** | [.06, .14]  | .06(.02)**  | [.02, .11]  | .18(.04)*** | [.10, .26]  |
| <b>Age*activity frequency at W2</b> | -.00(.00)   | [-.00, .00] | -.00(.00)   | [-.00, .00] | .00(.00)    | [-.00, .01] |

*Notes:*  $N = 2049$ . Scores of activity frequency, activity variety, and three cognitive variables (overall cognitive functioning, executive functioning, episodic memory) were standardized. The main variables of interest are highlighted. CI = confidence interval.

<sup>a</sup> Further analyses were conducted for the relationship between overall activity variety at W2 and executive functioning (EF) at W3. In the older adults whose age is 1 standard deviation above the mean, overall activity variety at W2 significantly and positively predicted EF at W3 [ $B = 0.10$ ,  $SE = 0.03$ ,  $p < 0.001$ ]. In the average-aged adults, overall activity variety at W2 also positively predicted EF at W3 [ $B = 0.10$ ,  $SE = 0.03$ ,  $p < 0.01$ ]. Yet, in the younger adults whose age is 1 standard deviation below the mean, overall activity variety at W2 did not predict EF at W3 [ $B = 0.3$ ,  $SE = 0.02$ ,  $p = 0.17$ ].

---

\*  $p < .05$ , \*\*  $p < .01$ , \*\*\*  $p < .0001$ .



Supplementary Figure 1

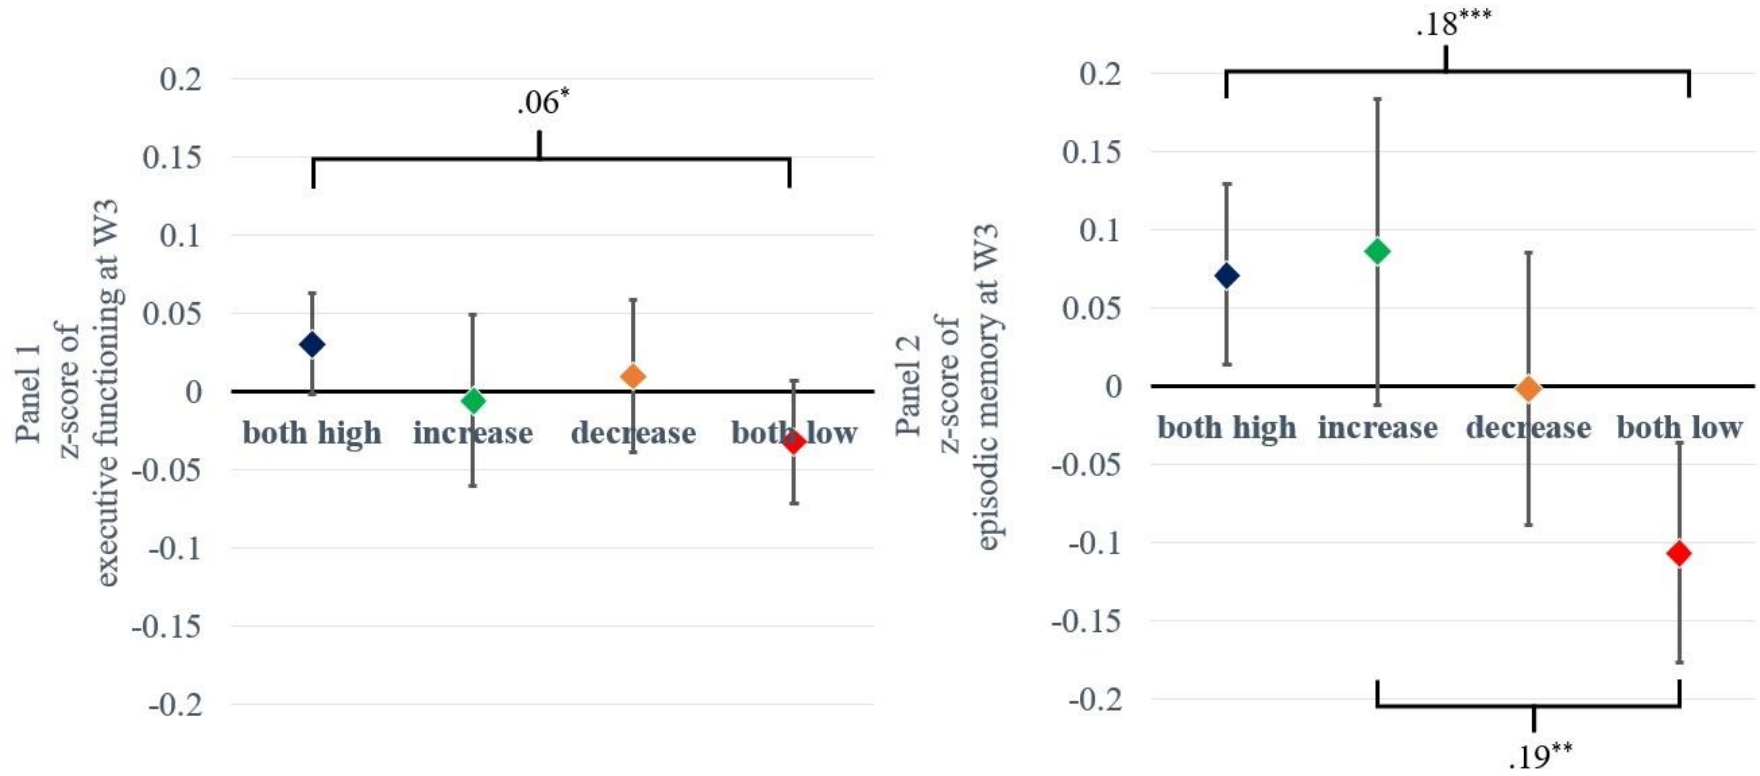

**both high:** relatively high overall activity variety (OAV) at W2 and W3  
**increase:** relatively low OAV at W2 and relatively high OAV at W3  
**decrease:** relatively high OAV at W2 and relatively low OAV at W3  
**both low:** relatively low OAV at W2 and W3

Supplementary Figure 2

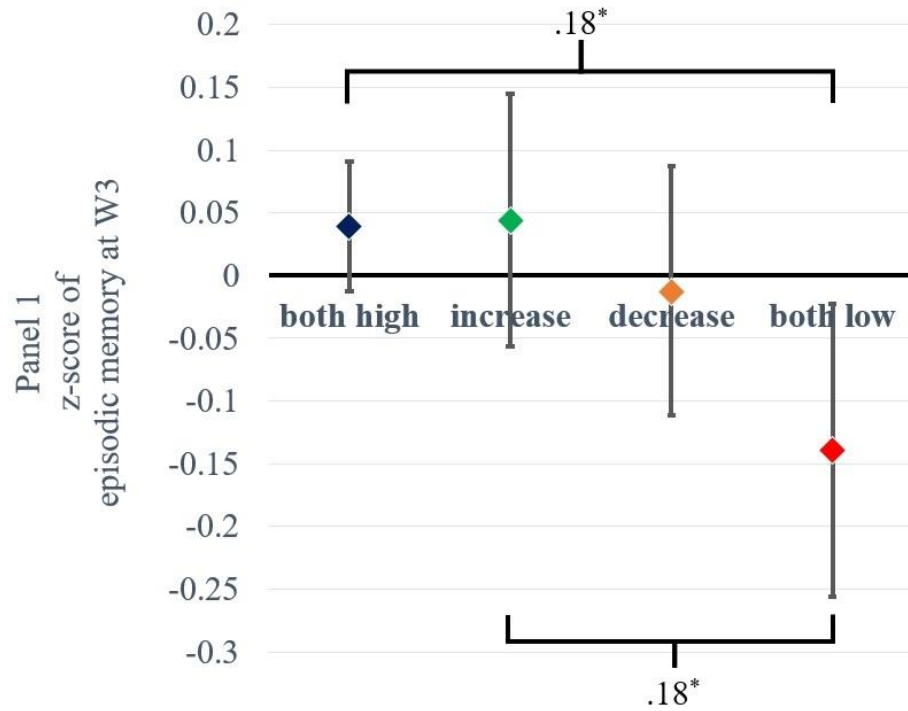

**both high:** relatively high physical activity variety (PAV) at W2 and W3  
**increase:** relatively low PAV at W2 and relatively high PAV at W3  
**decrease:** relatively high PAV at W2 and relatively low PAV at W3  
**both low:** relatively low PAV at W2 and W3

Supplementary Figure 3

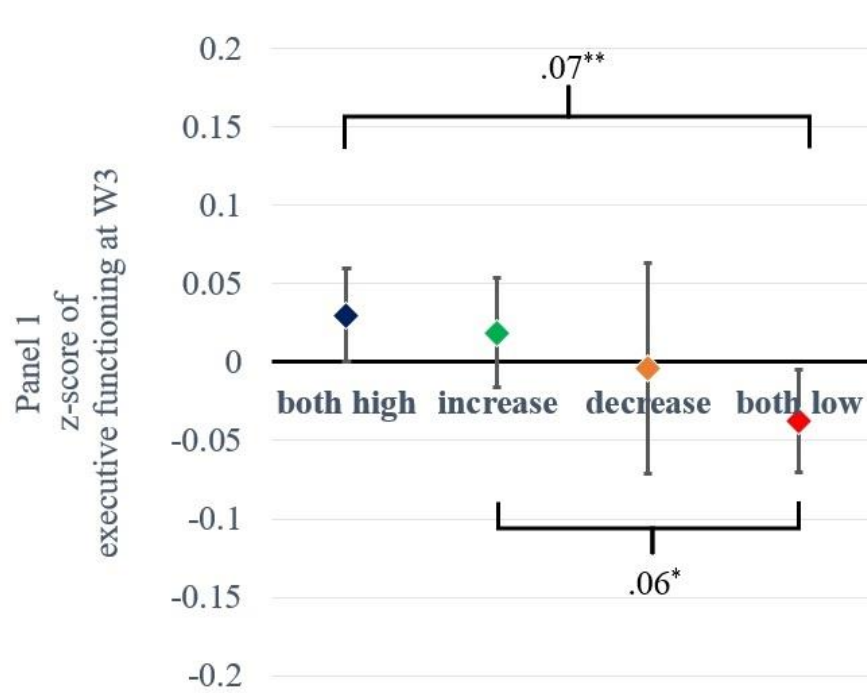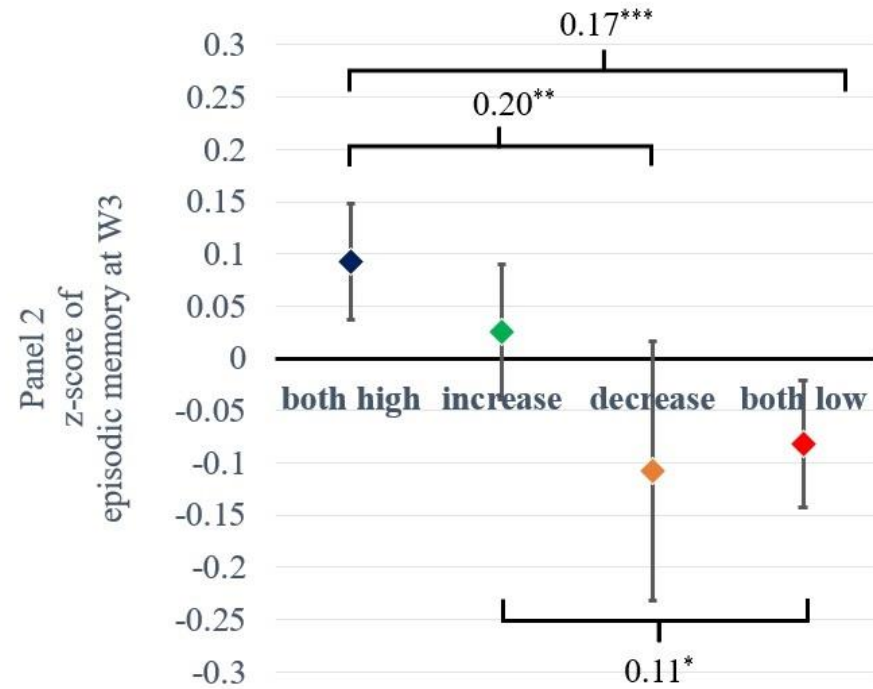

**both high:** relatively high social activity variety (SAV) at W2 and W3  
**increase:** relatively low SAV at W2 and relatively high SAV at W3  
**decrease:** relatively high SAV at W2 and relatively low SAV at W3  
**both low:** relatively low SAV at W2 and W3
